# Supplementary material
Source: Springer Nature journal article supplement (https://www.springermedizin.de/resource/supplementary/12967_2011_846_MOESM4_ESM.pdf/9577192)

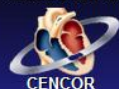

# 2 YEAR FOLLOW UP

## A

### BASELINE

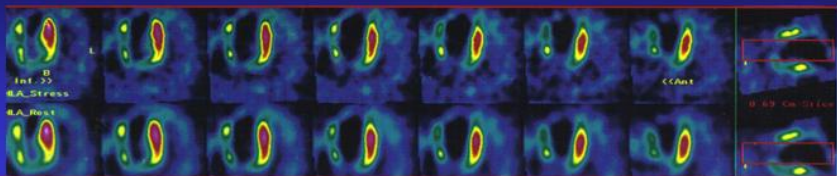

### 1 YEAR

### FOLLOW UP

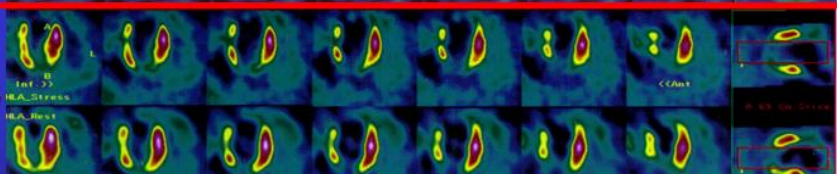

### 2 YEARS

### FOLLOW UP

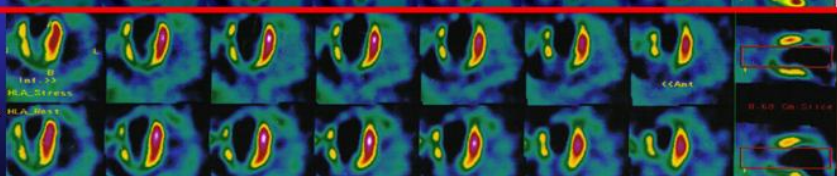

## B

### BASELINE

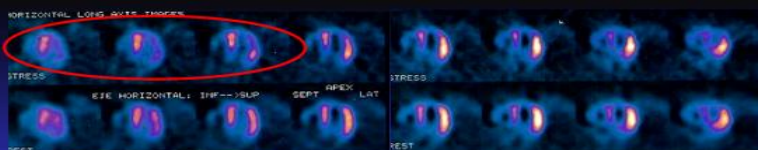

### 6 MONTHS

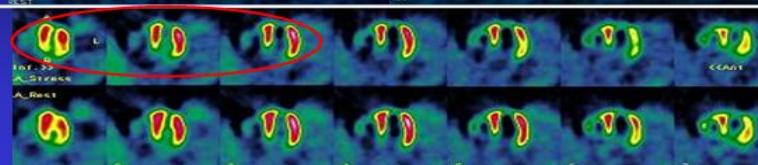

### 1 YEAR

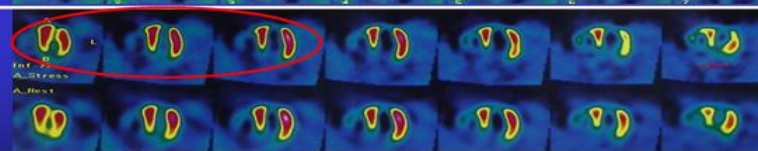

### 2 YEARS

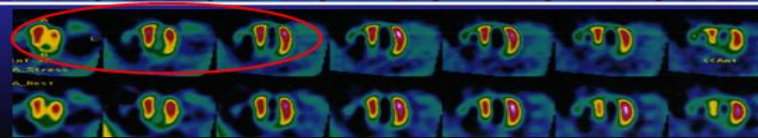

Supplement: MOESM4 [file 9577192]
